# Supplementary figures and images for: Influence of gardenia yellow on in vitro slow starch digestion and its action mechanism
Source: Royal Society of Chemistry journal article supplement (doi:10.1039/d1ra08276k), 2022-01-01

**Figure S1.**

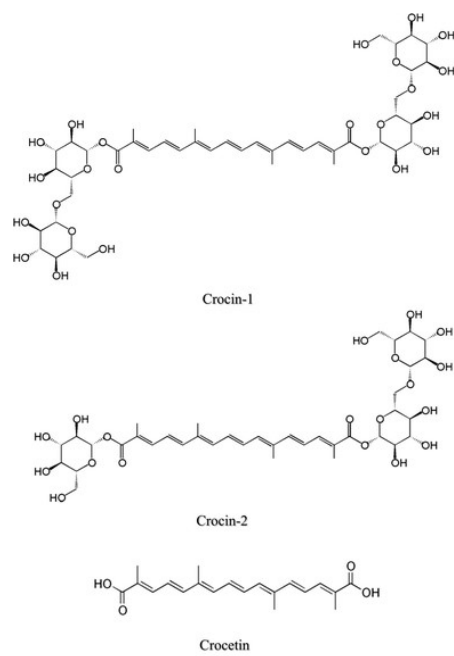

**Fig. S1.** The chemical structures of crocin and crocetin

Supplement: d1ra08276k1.pdf [file d1ra08276k1.pdf]
